# Supplementary material
Source: publisher site journal article supplement (https://www.dovepress.com/article/544998)
Supplement: Supplementary file 1 [file Supplementary%20File.pdf]

## Supplementary File 1. PRISMA 2020 Checklist

| Section and Topic             | Item # | Checklist item                                                                                                                                                                                                                                                                                       | Location where item is reported |
|-------------------------------|--------|------------------------------------------------------------------------------------------------------------------------------------------------------------------------------------------------------------------------------------------------------------------------------------------------------|---------------------------------|
| <b>TITLE</b>                  |        |                                                                                                                                                                                                                                                                                                      |                                 |
| Title                         | 1      | Identify the report as a systematic review.                                                                                                                                                                                                                                                          | Page 1                          |
| <b>ABSTRACT</b>               |        |                                                                                                                                                                                                                                                                                                      |                                 |
| Abstract                      | 2      | See the PRISMA 2020 for Abstracts checklist.                                                                                                                                                                                                                                                         | Page 2                          |
| <b>INTRODUCTION</b>           |        |                                                                                                                                                                                                                                                                                                      |                                 |
| Rationale                     | 3      | Describe the rationale for the review in the context of existing knowledge.                                                                                                                                                                                                                          | Page 3, 4                       |
| Objectives                    | 4      | Provide an explicit statement of the objective(s) or question(s) the review addresses.                                                                                                                                                                                                               | Page 4                          |
| <b>METHODS</b>                |        |                                                                                                                                                                                                                                                                                                      |                                 |
| Eligibility criteria          | 5      | Specify the inclusion and exclusion criteria for the review and how studies were grouped for the syntheses.                                                                                                                                                                                          | Page 5                          |
| Information sources           | 6      | Specify all databases, registers, websites, organisations, reference lists and other sources searched or consulted to identify studies. Specify the date when each source was last searched or consulted.                                                                                            | Page 5                          |
| Search strategy               | 7      | Present the full search strategies for all databases, registers and websites, including any filters and limits used.                                                                                                                                                                                 | Page 5                          |
| Selection process             | 8      | Specify the methods used to decide whether a study met the inclusion criteria of the review, including how many reviewers screened each record and each report retrieved, whether they worked independently, and if applicable, details of automation tools used in the process.                     | Page 6                          |
| Data collection process       | 9      | Specify the methods used to collect data from reports, including how many reviewers collected data from each report, whether they worked independently, any processes for obtaining or confirming data from study investigators, and if applicable, details of automation tools used in the process. | Page 6                          |
| Data items                    | 10a    | List and define all outcomes for which data were sought. Specify whether all results that were compatible with each outcome domain in each study were sought (e.g. for all measures, time points, analyses), and if not, the methods used to decide which results to collect.                        | Page 6                          |
|                               | 10b    | List and define all other variables for which data were sought (e.g. participant and intervention characteristics, funding sources). Describe any assumptions made about any missing or unclear information.                                                                                         | Page 6                          |
| Study risk of bias assessment | 11     | Specify the methods used to assess risk of bias in the included studies, including details of the tool(s) used, how many reviewers assessed each study and whether they worked independently, and if applicable, details of automation tools used in the process.                                    | Page 6                          |
| Effect measures               | 12     | Specify for each outcome the effect measure(s) (e.g. risk ratio, mean difference) used in the synthesis or presentation of results.                                                                                                                                                                  | Page 7                          |
| Synthesis methods             | 13a    | Describe the processes used to decide which studies were eligible for each synthesis (e.g. tabulating the study intervention characteristics and comparing against the planned groups for each synthesis (item #5)).                                                                                 | Page 7                          |
|                               | 13b    | Describe any methods required to prepare the data for presentation or synthesis, such as handling of missing summary statistics, or data conversions.                                                                                                                                                | Page 7                          |
|                               | 13c    | Describe any methods used to tabulate or visually display results of individual studies and syntheses.                                                                                                                                                                                               | Page 7                          |
|                               | 13d    | Describe any methods used to synthesize results and provide a rationale for the choice(s). If meta-analysis was performed, describe the model(s), method(s) to identify the presence and extent of statistical heterogeneity, and software package(s) used.                                          | Page 7                          |
|                               | 13e    | Describe any methods used to explore possible causes of heterogeneity among study results (e.g. subgroup analysis, meta-regression).                                                                                                                                                                 | Page 7                          |
|                               | 13f    | Describe any sensitivity analyses conducted to assess robustness of the synthesized results.                                                                                                                                                                                                         | Page 7                          |
| Reporting bias assessment     | 14     | Describe any methods used to assess risk of bias due to missing results in a synthesis (arising from reporting biases).                                                                                                                                                                              | Page 7                          |
| Certainty assessment          | 15     | Describe any methods used to assess certainty (or confidence) in the body of evidence for an outcome.                                                                                                                                                                                                | Page 7                          |
| <b>RESULTS</b>                |        |                                                                                                                                                                                                                                                                                                      |                                 |

| Section and Topic                              | Item # | Checklist item                                                                                                                                                                                                                                                                       | Location where item is reported |
|------------------------------------------------|--------|--------------------------------------------------------------------------------------------------------------------------------------------------------------------------------------------------------------------------------------------------------------------------------------|---------------------------------|
| Study selection                                | 16a    | Describe the results of the search and selection process, from the number of records identified in the search to the number of studies included in the review, ideally using a flow diagram.                                                                                         | Page 7, 8<br>Figure 1           |
|                                                | 16b    | Cite studies that might appear to meet the inclusion criteria, but which were excluded, and explain why they were excluded.                                                                                                                                                          | Page 7, 8<br>Figure 1           |
| Study characteristics                          | 17     | Cite each included study and present its characteristics.                                                                                                                                                                                                                            | Page 8,<br>Table 1              |
| Risk of bias in studies                        | 18     | Present assessments of risk of bias for each included study.                                                                                                                                                                                                                         | Page 8, 9<br>Figure 2           |
| Results of individual studies                  | 19     | For all outcomes, present, for each study: (a) summary statistics for each group (where appropriate) and (b) an effect estimate and its precision (e.g. confidence/credible interval), ideally using structured tables or plots.                                                     | Page 9-11<br>Figure 3-5         |
| Results of syntheses                           | 20a    | For each synthesis, briefly summarise the characteristics and risk of bias among contributing studies.                                                                                                                                                                               | Page 9-11                       |
|                                                | 20b    | Present results of all statistical syntheses conducted. If meta-analysis was done, present for each the summary estimate and its precision (e.g. confidence/credible interval) and measures of statistical heterogeneity. If comparing groups, describe the direction of the effect. | Page 9-11                       |
|                                                | 20c    | Present results of all investigations of possible causes of heterogeneity among study results.                                                                                                                                                                                       | Page 9-11                       |
|                                                | 20d    | Present results of all sensitivity analyses conducted to assess the robustness of the synthesized results.                                                                                                                                                                           | Page 9-11                       |
| Reporting biases                               | 21     | Present assessments of risk of bias due to missing results (arising from reporting biases) for each synthesis assessed.                                                                                                                                                              | Page 8-11                       |
| Certainty of evidence                          | 22     | Present assessments of certainty (or confidence) in the body of evidence for each outcome assessed.                                                                                                                                                                                  | Page 11                         |
| <b>DISCUSSION</b>                              |        |                                                                                                                                                                                                                                                                                      |                                 |
| Discussion                                     | 23a    | Provide a general interpretation of the results in the context of other evidence.                                                                                                                                                                                                    | Page 11, 12                     |
|                                                | 23b    | Discuss any limitations of the evidence included in the review.                                                                                                                                                                                                                      | Page 14, 15                     |
|                                                | 23c    | Discuss any limitations of the review processes used.                                                                                                                                                                                                                                | Page 14, 15                     |
|                                                | 23d    | Discuss implications of the results for practice, policy, and future research.                                                                                                                                                                                                       | Page 14                         |
| <b>OTHER INFORMATION</b>                       |        |                                                                                                                                                                                                                                                                                      |                                 |
| Registration and protocol                      | 24a    | Provide registration information for the review, including register name and registration number, or state that the review was not registered.                                                                                                                                       | Page 4                          |
|                                                | 24b    | Indicate where the review protocol can be accessed, or state that a protocol was not prepared.                                                                                                                                                                                       | Page 4                          |
|                                                | 24c    | Describe and explain any amendments to information provided at registration or in the protocol.                                                                                                                                                                                      | Page 4                          |
| Support                                        | 25     | Describe sources of financial or non-financial support for the review, and the role of the funders or sponsors in the review.                                                                                                                                                        | Page 16                         |
| Competing interests                            | 26     | Declare any competing interests of review authors.                                                                                                                                                                                                                                   | Page 16                         |
| Availability of data, code and other materials | 27     | Report which of the following are publicly available and where they can be found: template data collection forms; data extracted from included studies; data used for all analyses; analytic code; any other materials used in the review.                                           | Page 16, 17                     |

From: Page MJ, McKenzie JE, Bossuyt PM, Boutron I, Hoffmann TC, Mulrow CD, et al. The PRISMA 2020 statement: an updated guideline for reporting systematic reviews. *BMJ* 2021;372:n71. doi: 10.1136/bmj.n71

For more information, visit: <http://www.prisma-statement.org/>

## **Supplementary File 2. Search Strategies**

### **Appendix 1. Pubmed**

“Fu's Subcutaneous Needling” [Title/Abstract] OR “Fu's Acupuncture” [Title/Abstract] OR “Floating Needle” [Title/Abstract] OR “Fu Needling” [Title/Abstract] OR “Floating-Acupuncture” [Title/Abstract] OR “FSN” [Title/Abstract]

#### **Limiters**

- Article type: Randomized Controlled Trial

### **Appendix 2. Web of Science**

All Fields (Topic)= “Fu's Subcutaneous Needling” OR “Fu's Acupuncture” OR “Floating Needle” OR “Fu Needling” OR “Floating-Acupuncture” OR “FSN”

#### **Limiters**

- Documents type: Clinical Trial

### **Appendix 3. Scopus**

Title Abstract Keyword = “Fu's Subcutaneous Needling” OR “Fu's Acupuncture” OR “Floating Needle” OR “Fu Needling” OR “Floating-Acupuncture” OR “FSN”

#### **Limiters**

- Academic Discipline: Medicine
- Documents type: Article

### **Appendix 4. Cochrane library**

Title Abstract Keyword = “Fu's Subcutaneous Needling” OR “Fu's Acupuncture” OR “Floating Needle” OR “Fu Needling” OR “Floating-Acupuncture” OR “FSN”

## **Appendix 5. Embase**

All Fields = "Fu Subcutaneous Needling" OR "Fu Acupuncture" OR "Floating Needle"  
OR "Fu Needling" OR "Floating-Acupuncture" OR "FSN"

### **Limiters**

- Evidence Based Medicine: Randomized Controlled Trial

## **Appendix6. Clinical Trials. gov**

Other terms = "Fu's Subcutaneous Needling" OR "Fu's Acupuncture" OR "Floating  
Needle" OR "Fu Needling" OR "Floating-Acupuncture" OR "FSN"

### **Limiters**

- Study Results: With results

**Supplementary File 3.** List of Studies Excluded After Full-Text Review with Reasons for Exclusion

| <b>Study ID (Author, Year)</b> | <b>Full Title of the Excluded Study</b>                                                                                                                                        | <b>Primary Reason for Exclusion</b> |
|--------------------------------|--------------------------------------------------------------------------------------------------------------------------------------------------------------------------------|-------------------------------------|
| Yang et al., 2024              | Understanding tightened muscle in knee osteoarthritis and the impacts of Fu's subcutaneous needling: A pilot trial with shear-wave elastography and near-infrared spectroscopy | Not RCT                             |
| Xia et al., 2004               | Combination of Fu needling with electric acupuncture for tennis elbow                                                                                                          | Not RCT                             |
| Zhang et al., 2024             | Treatment of sudden sensorineural hearing loss with tinnitus with Fu subcutaneous needling: A case report                                                                      | Not RCT                             |
| Jiang et al., 2023             | Relationship between the inserting sites of Fu's subcutaneous needling and traditional acupoints: revelation to acupuncture and moxibustion                                    | Not RCT                             |
| Qu et al., 2024                | Treatment of primary restless legs syndrome with Fu's subcutaneous needling: A case report                                                                                     | Not RCT                             |
| Gao et al., 2023               | Treatment of postsurgical trigeminal neuralgia with Fu's subcutaneous needling therapy resulted in prompt complete relief: Two case reports                                    | Not RCT                             |
| Liang et al., 2023             | Treatment of postsurgical gastroparesis syndrome with Fu's subcutaneous needling: A case report                                                                                | Not RCT                             |
| Bao et al., 2021               | Treatment effect and mechanism of Fu's subcutaneous needling among patients with shoulder pain: A retrospective pilot study                                                    | Not RCT                             |
| Yu et al., 2019                | Treatment of varicocele with Fu's subcutaneous needling A case report                                                                                                          | Not RCT                             |
| Huang et al., 2020             | Fu's subcutaneous needling for subcutaneous adhesions and scar hyperplasia in the neck region A case report                                                                    | Not RCT                             |
| Shi et al., 2024               | Fu's subcutaneous needling combined with monkshood cake-separated moxibustion for primary dysmenorrhea with cold congealing and blood stasis: a randomized controlled trial    | Multicomponent intervention         |
| Tao et al., 2024               | Fu's subcutaneous needling for non-acute idiopathic facial paralysis : a randomized                                                                                            | Multicomponent intervention         |

|                    |                                                                                                                                                                                  |                             |
|--------------------|----------------------------------------------------------------------------------------------------------------------------------------------------------------------------------|-----------------------------|
|                    | controlled trial                                                                                                                                                                 |                             |
| Wang et al., 2024  | Fu's subcutaneous needling combined with scalp acupuncture for shoulder-hand syndrome phase I after cerebral infarction: a randomized controlled trial.                          | Multicomponent intervention |
| Yang et al., 2015  | The effect of floating-needle therapy combined with rehabilitation training for the hand function recovery of post-stroke patients                                               | Multicomponent intervention |
| Zhou et al., 2014  | Post-stroke shoulder-hand syndrome treated with floating-needle therapy combined with rehabilitation training: a randomized controlled trial                                     | Multicomponent intervention |
| Huang et al., 2022 | Efficacy of Fu's Subcutaneous Needling on Myofascial Trigger Points for Lateral Epicondylalgia: A Randomized Control Trial                                                       | Indefinite diagnosis        |
| Chen et al., 2021  | Study on the therapeutic effect of floating needle therapy combined with pressing acupoint embedding for female stress urinary incontinence after childbirth: a randomized trial | Indefinite diagnosis        |
| Fu et al., 2007    | Fu's subcutaneous needling: Possible clinical evidence of the subcutaneous connective tissue in acupuncture                                                                      | Inappropriate control group |
| Zheng et al., 2021 | Therapeutic observation on Fu's acupuncture for cervical spondylosis of vertebral artery type based on Tongtuo method                                                            | Inappropriate control group |
| Wang et al., 2013  | Observation on the clinical efficacy of shoulder pain in post-stroke shoulder-hand syndrome treated with floating acupuncture and rehabilitation training                        | Inappropriate control group |
| Yang et al., 2020  | Effect of subcutaneous needling on visual analogue scale, IgG and IgM in patients with lumbar disc herniation Study protocol clinical trial                                      | Incomplete data             |
| Li et al., 2024    | The Impact of Fu's Subcutaneous Needling on Lower Limb Muscle Stiffness in Knee Osteoarthritis Patients: Study Protocol for a Pilot Randomized Controlled Trial                  | Incomplete data             |
| Li et al., 2024    | Effects of Fu's subcutaneous needling at myofascial trigger points on pain and lumbar mobility in patients with lumbar disc herniation: a randomized controlled trial.           | Incomplete data             |

|                    |                                                                                                                                                                                    |                 |
|--------------------|------------------------------------------------------------------------------------------------------------------------------------------------------------------------------------|-----------------|
| Huang et al., 2024 | Biomechanically based Fu's subcutaneous needling treatment for senile knee osteoarthritis: protocol for a randomized controlled trial                                              | Incomplete data |
| Chiu et al., 2021  | Evaluating Effectiveness of Fu's Subcutaneous Needling for the Pain Nature and Quality of Life in Patients with Knee Osteoarthritis: A Study Protocol of Randomized Clinical Trial | Incomplete data |
| Xu et al., 2023    | Effect of Fu's subcutaneous needling for cancer pain management: protocol for a pragmatic randomised controlled trial                                                              | Incomplete data |
| Liu et al., 2019   | Therapeutic effect of Fu's subcutaneous needling for hemiplegic shoulder pain among stroke survivors Study protocol for a randomized controlled trial                              | Incomplete data |
| Ge et al., 2019    | Floating needle therapy for postoperative functional rehabilitation in patients with surgical neck fracture of humerus: a randomized controlled trial                              | Incomplete data |
